# Supplementary material
Source: PubMed Central journal article supplement (PMC4613559)

**a**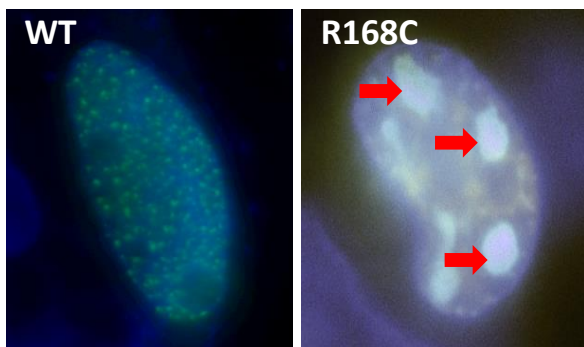**b**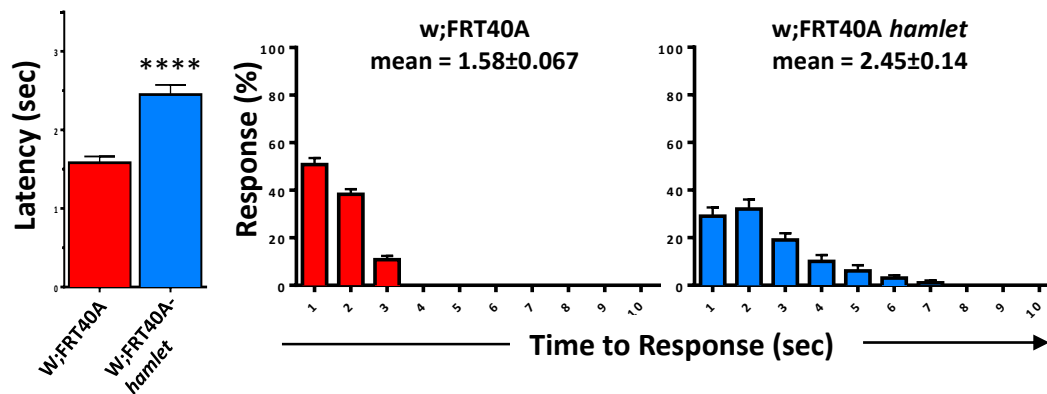**c**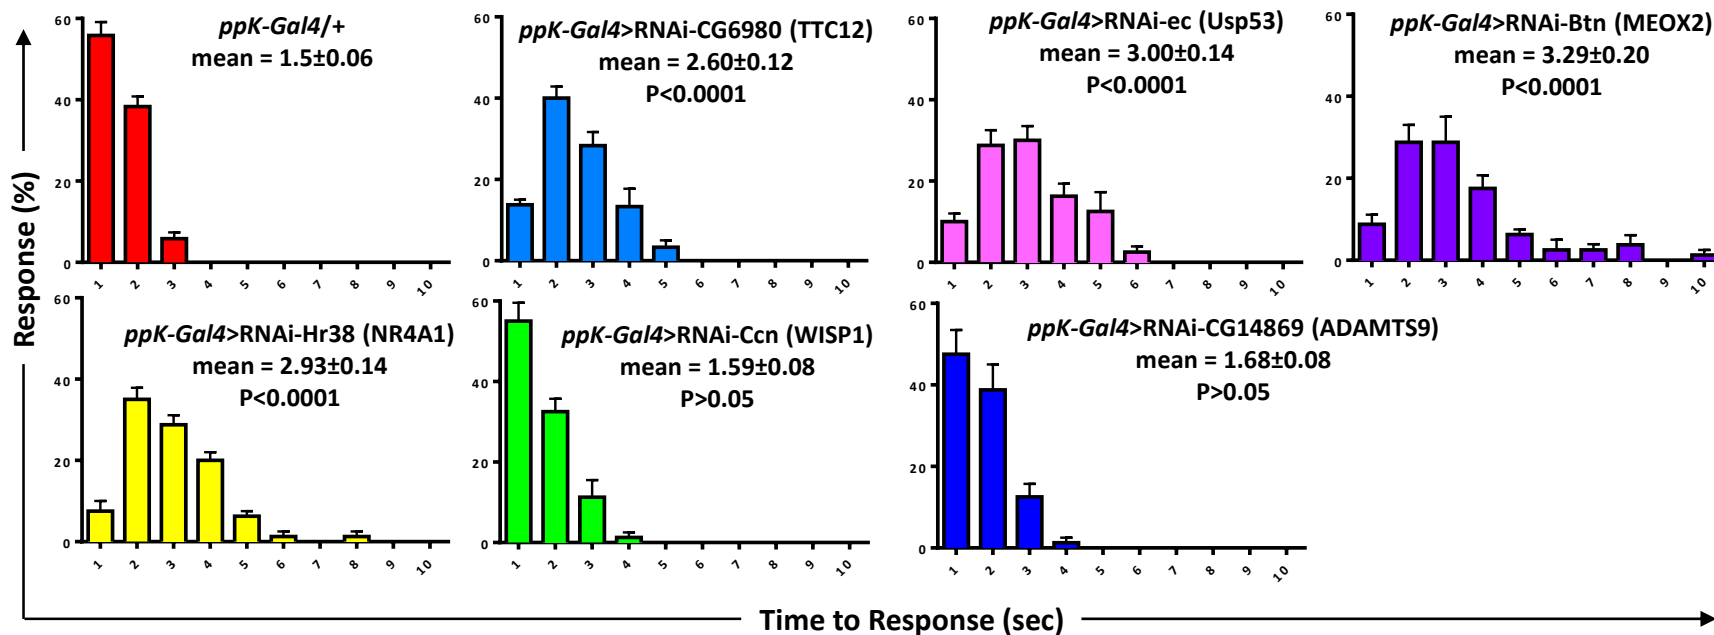

Supplement: kccy-14-12-1036209-s001.pdf [file kccy-14-12-1036209-s001.pdf]
